# Supplementary material
Source: Springer Nature journal article supplement (https://www.springermedizin.de/resource/supplementary/12913_2011_1856_MOESM4_ESM.pdf/9529084)
Supplement: MOESM4 [file 9529084]

Appendix. Sample attrition: Metastatic lung cancer

| Criteria                                                                                                                           | n      | ?       |
|------------------------------------------------------------------------------------------------------------------------------------|--------|---------|
| 1) Two or more lung cancer diagnoses                                                                                               | 25,708 |         |
| 2) Two or more diagnoses of secondary malignant neoplasm                                                                           | 6,398  | -19,310 |
| 3) Two or more diagnoses of other primary malignant neoplasm 60 days or more before first evidence of secondary malignant neoplasm | 6,289  | -109    |
| 4) - Include if site of metastasis is same as site of other primary                                                                | 6,398  | 109     |
| 5) Evidence of chemotherapy on or after first diagnosis of secondary malignant neoplasm or prior 45 days                           | 6,057  | -232    |
| 6) Continuous enrollment 12 months prior to diagnosis of secondary malignant neoplasm                                              | 4,068  | -1,989  |
